# Supplementary material
Source: Royal Society of Chemistry journal article supplement (doi:10.1039/d6nr00113k)
Supplement: d6nr00113k1.pdf [file d6nr00113k1.pdf]

## Integrating Green Chemistry into SPION Development: A Theranostic Study on Prostate Cell Models

Beatriz Morais,<sup>a</sup> Vital Filho,<sup>a,b</sup> Célia T. Sousa,<sup>c</sup> Fernanda Marques,<sup>a</sup> Sara Lacerda,<sup>d</sup> João Carlos Waerenborgh,<sup>a,b</sup> Bruno J. C. Vieira,<sup>a,b,e</sup> Teresa Pinheiro,<sup>e,f</sup> Rodica Mihaela Dinica,<sup>g</sup> Maria J. Carmezim,<sup>h</sup> Pedro M. P. Santos,<sup>a,e</sup> Sandra Même,<sup>d</sup> Dirk H. Ortgies,<sup>ij</sup> Laura C. J. Pereira,<sup>\* a,b,e</sup> and Maria Paula Cabral Campello <sup>\*a,e</sup>

### Supplementary Materials

#### CONTENTS

|                                                                                                                                                                                                                                       |    |
|---------------------------------------------------------------------------------------------------------------------------------------------------------------------------------------------------------------------------------------|----|
| Table S1. Content of Fe, Au and Gd in the SPIONs, measured by PIXE (dry weight)                                                                                                                                                       | S2 |
| Figure S1. UV-vis spectra of nanoplatforms leaf extract SPLV, in Milli-Q water                                                                                                                                                        | S2 |
| Figure S2- FTIR spectra for both routes of multifunctional nanoplatforms leaf extract SPLV                                                                                                                                            | S3 |
| Figure S3 Powder X-Ray diffraction patterns of (b) SP-LV-Au3-Gd and (d) SP-LV-Au1-Gd.                                                                                                                                                 | S3 |
| Figure S4- Transmission electron microscopy images of (Up) SP-LV-Au3-Gd and (down) SP-LV-Au1-Gd, and respective histogram.                                                                                                            | S4 |
| Einstein Equation                                                                                                                                                                                                                     | S4 |
| Figure S5 - Histograms of the size distribution by number of LV samples by DLS analysis.                                                                                                                                              | S5 |
| Figure S6 - Histograms of the Zeta Potential distribution samples by DLS analysis                                                                                                                                                     | S6 |
| Figure S7 - Selection of the appropriate concentrations for the irradiation studies                                                                                                                                                   | S6 |
| <i>Radiosensitising studies by <sup>60</sup>Co <math>\gamma</math>-rays</i><br>Figure S8- t-test APA presented as mean $\pm$ SD (n=4) with statistical significance represented as; P<0.12; ns; P<0.033; *, P<0.002; **, P<0.001; *** | S7 |

**Table S1** - Content of Fe, Au and Gd in the SPIONs, measured by PIXE

| Sample       | Fe (%)   | Au (%)   | Gd (%)   | Ratio [Fe:Gd] |
|--------------|----------|----------|----------|---------------|
| SP           | 89.2±0.1 | -        | -        | -             |
| SP-Dx-Au     | 42.2±0.3 | 14.3±0.3 | -        | 3.0:1         |
| SP-Dx-Au-Gd  | 34.4±0.2 | 15.9±0.4 | 3.7±0.2  | 2.2:1         |
| SP-LV-Au3    | 18.7±0.4 | 39.8±0.9 | -        | 1:2.1         |
| SP-LV-Au3-Gd | 16.6±0.2 | 26.3±0.5 | 4.1±0.1  | 1:1.6         |
| SP-LV-Au1    | 30.8±0.7 | 9.2±0.5  | -        | 3.3:1         |
| SP-LV-Au1-Gd | 36.2±0.3 | 8.2±0.1  | 22.8±0.6 | 4.4:1         |

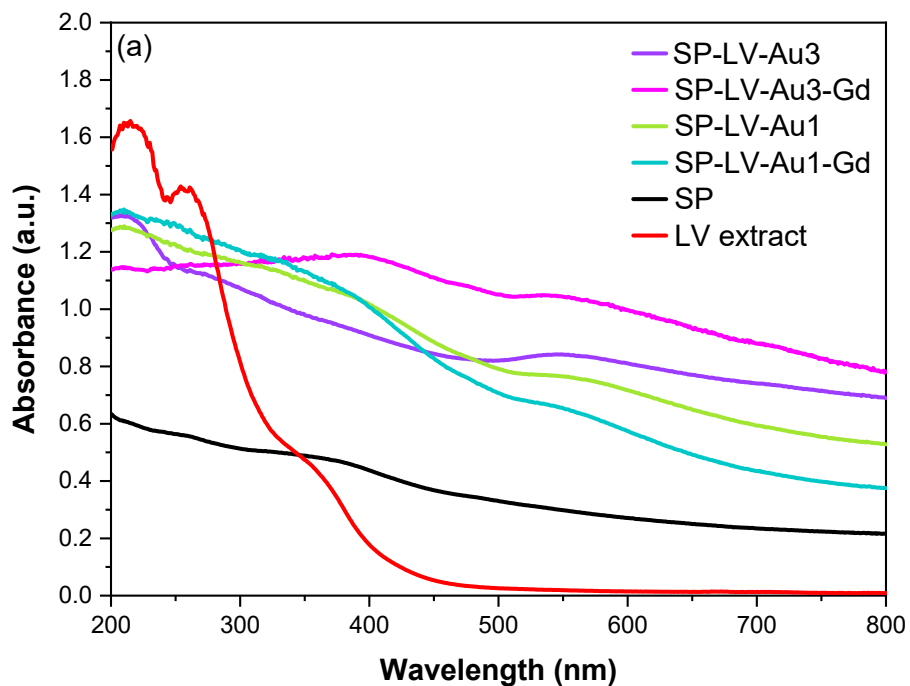

**Figure S1** - UV-vis spectra of nanoplateforms leaf extract SPLV, in Milli-Q water

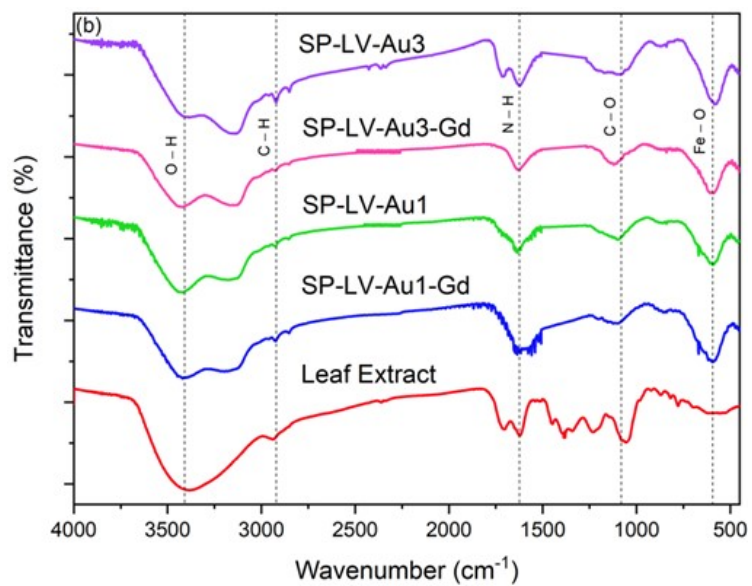

**Figure S2-** FTIR spectra for both routes of multifunctional nanoplateforms leaf extract SPLV

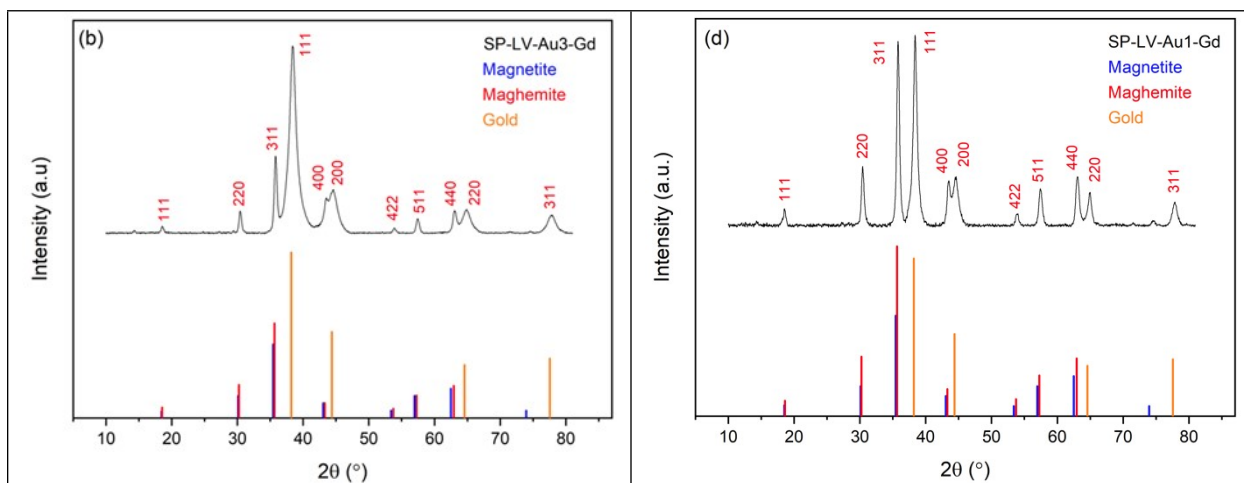

**Figure S3 -** Powder X-Ray diffraction patterns of (b) SP-LV-Au3-Gd and (d) SP-LV-Au1-Gd.

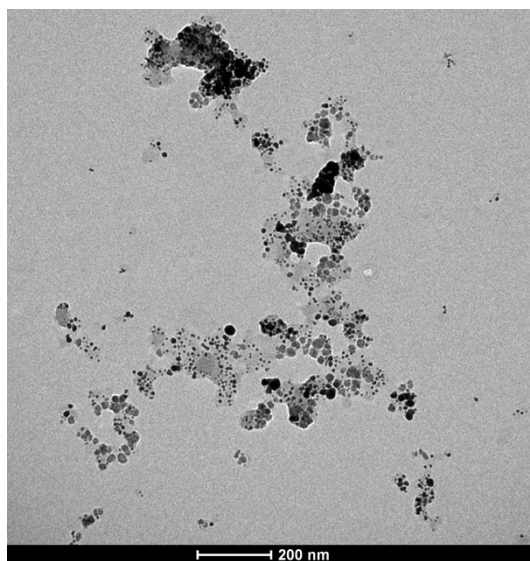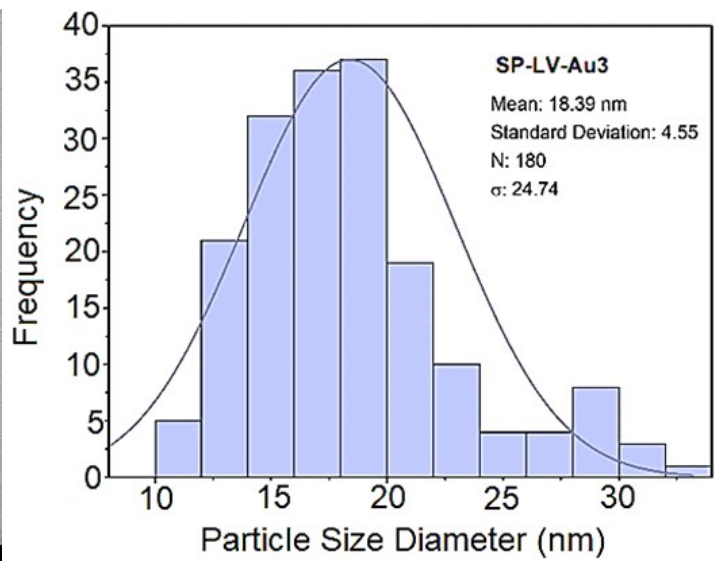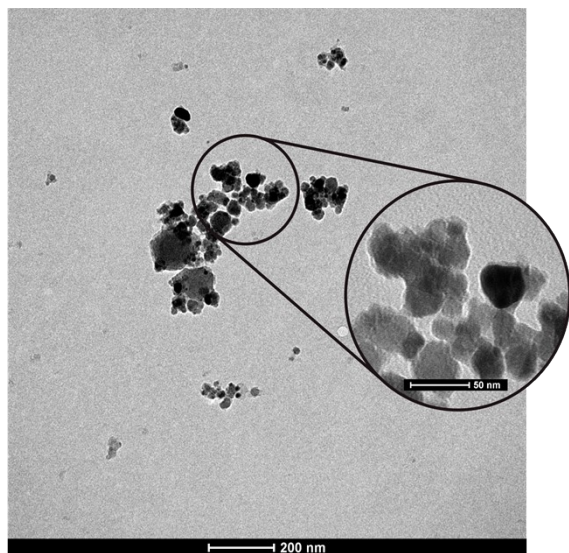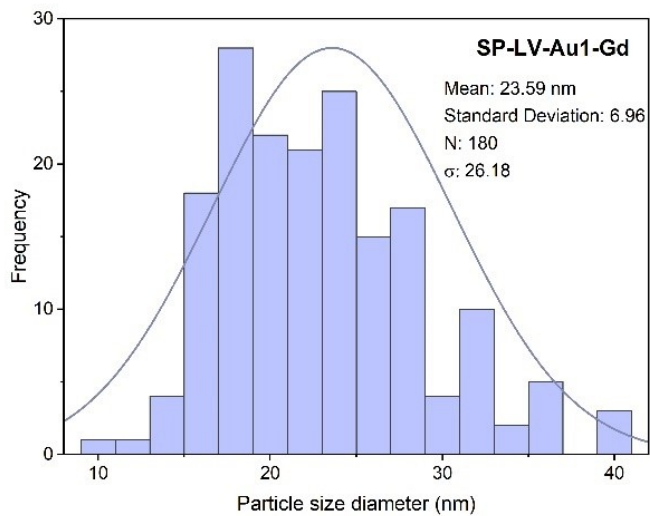

**Figure S4-** Transmission electron microscopy images of (Up) SP-LV-Au3-Gd and (down) SP-LV-Au1-Gd, and respective histogram.

### Einstein Equation

$$D = \frac{k_B T}{6\pi\eta\alpha}$$

where  $k_B$  is the Boltzmann constant,  $T$  is the temperature,  $\eta$  denotes the viscosity of the solvent, which is water in our case ( $\eta = 8.9 \times 10^{-4}$  Pa s), and  $\alpha$  is the radius of the solute.

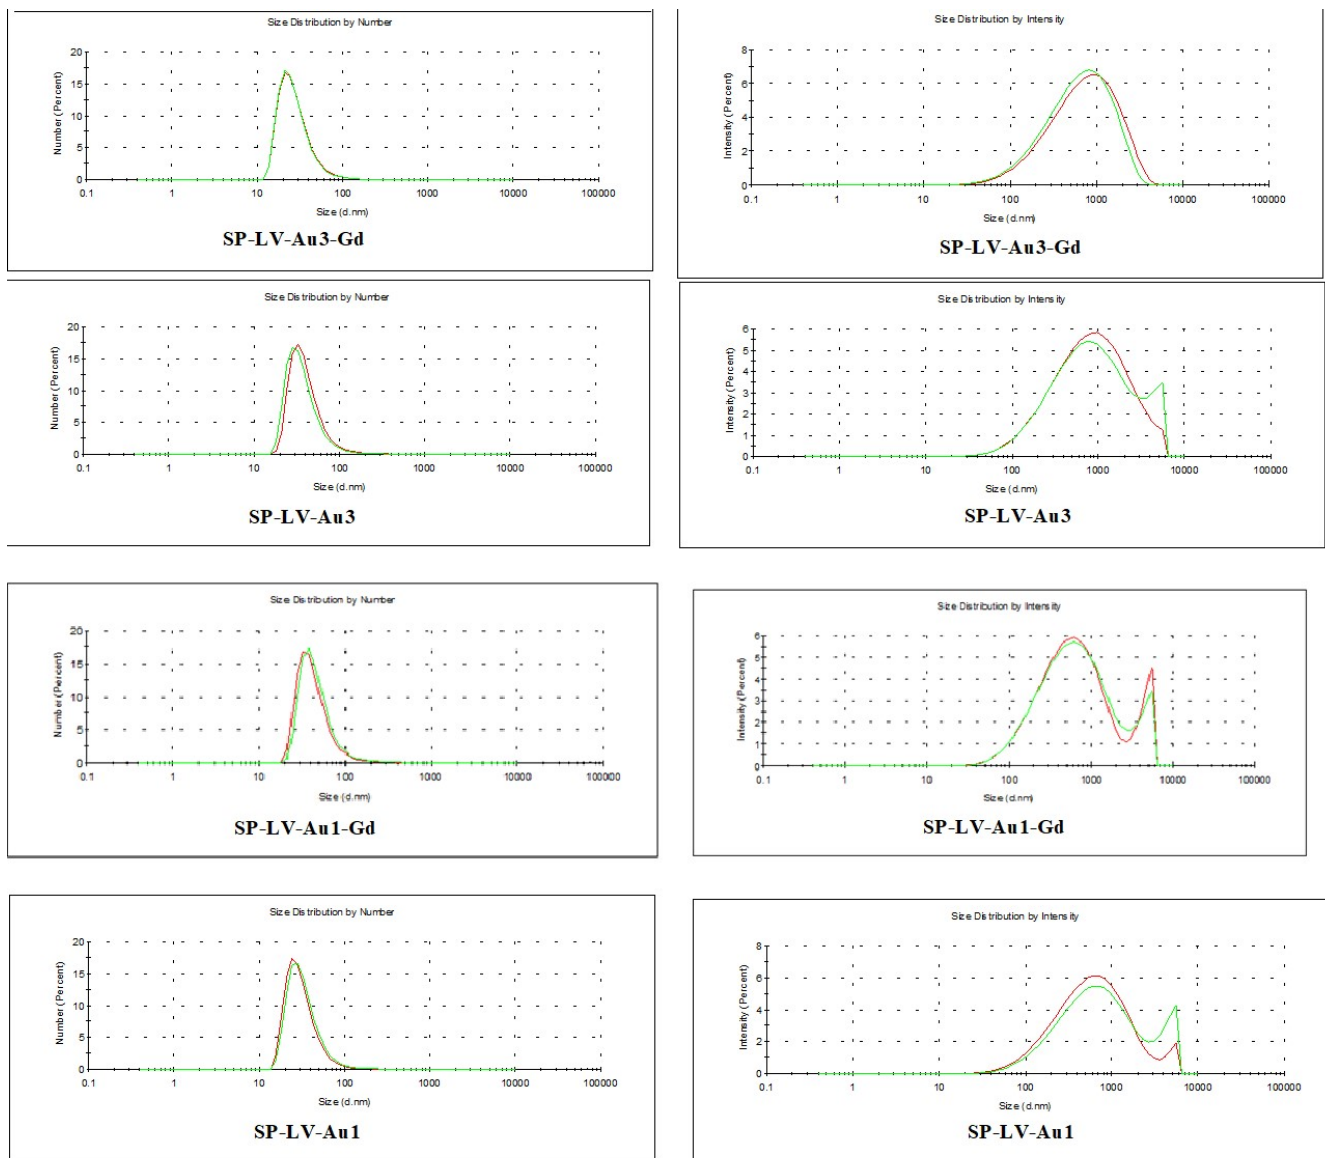

Figure S5 - Histograms of the size distribution by number of LV samples by DLS analysis.

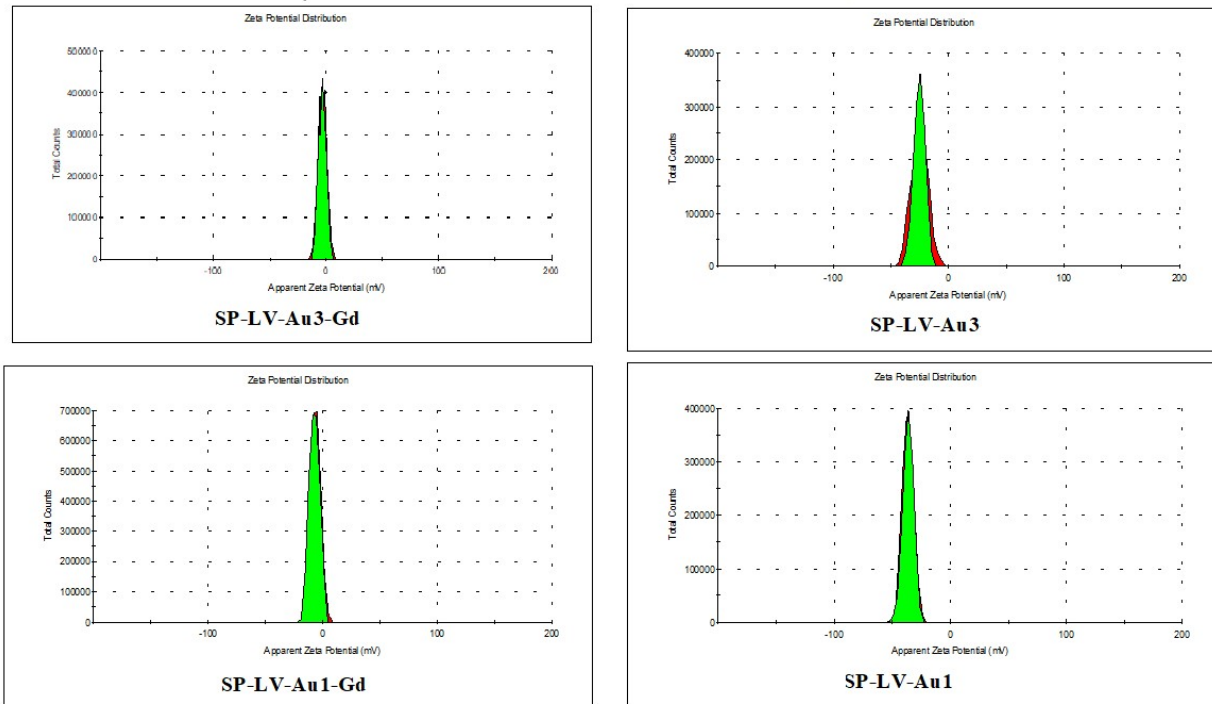

**Figure S6** - Histograms of the Zeta Potential distribution samples by DLS analysis

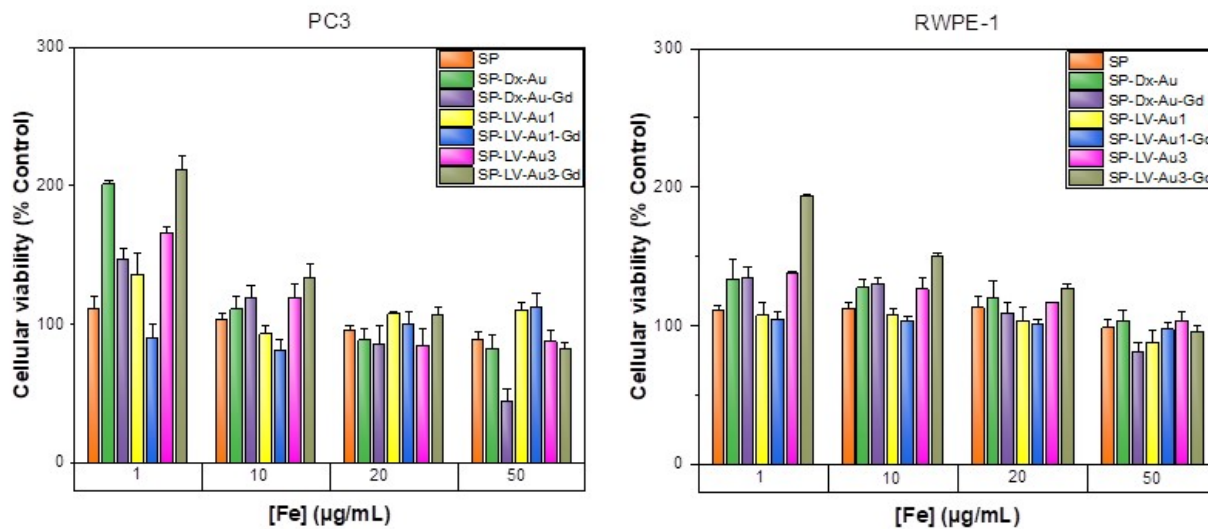

**Figure S7** Selection of the appropriate concentrations for the irradiation studies

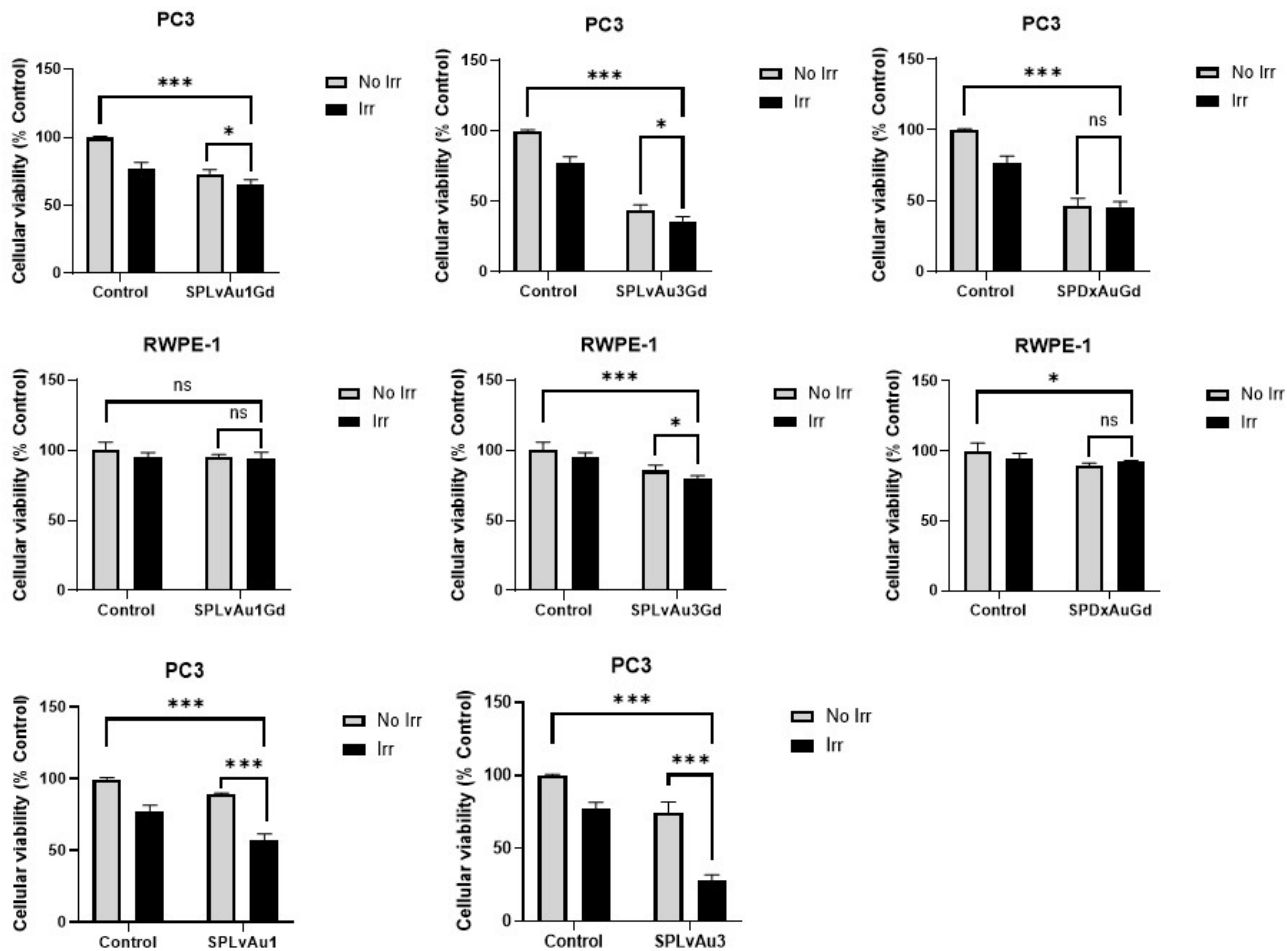

**Figure S8.** Cellular viability of PC3 and RWPE-1 cells treated with each nanoplateform at 20 µg (Fe)/mL and non-treated (controls) with/without  $\gamma$ -rays ( $^{60}\text{Co}$ , 2 Gy) irradiation and after 72 h post-irradiation using the MTT assay. Results are expressed as mean  $\pm$  SD (n = 4). T-test APA as the mean  $\pm$  SD (n=4) with statistical significance represented as: P<0.12; ns; P<0.033; \*; P<0.002; \*\*, P<0.001. \*\*\*
